# Supplementary material for: Diastereoselective photodimerization reactions of chromone-2-carboxamides to construct a C2-chiral scaffold
Source: Royal Society of Chemistry journal article supplement (doi:10.1039/c4ob01827c), 2014-01-01

## Supporting Information

### X-Ray diffraction analysis data of **1a**

Colorless prismatic crystals from chloroform-hexane, trigonal space group  $P3_1$ ,  $a = 13.4187(3) \text{ \AA}$ ,  $b = 13.4187(3) \text{ \AA}$ ,  $c = 28.8186(6) \text{ \AA}$ ,  $\gamma = 120.0^\circ$ ,  $V = 4493.9(2) \text{ \AA}^3$ ,  $Z = 12$ ,  $\rho = 1.301 \text{ g/cm}^3$ ,  $\mu = 0.724 \text{ mm}^{-1}$ . The structure was solved by the direct method of full matrix least-squares, where the final  $R$  and  $wR$  were 0.1240 and 0.3327 for 9005 reflections. CCDC 1010749.

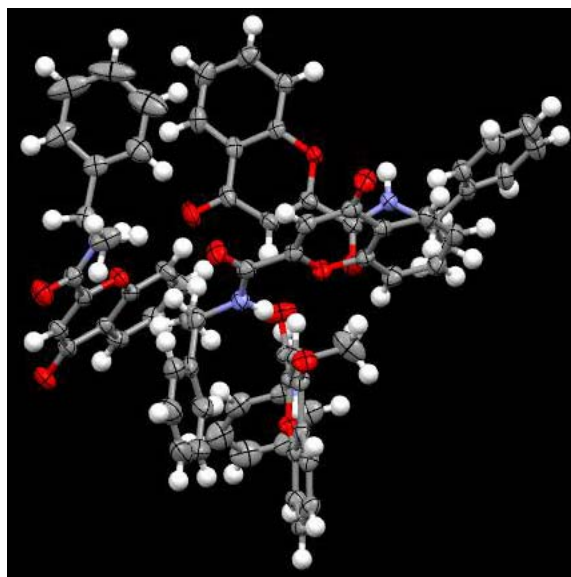

**Figure S1.** Perspective view of **1a**.

### X-Ray diffraction analysis data of **1b**

Colorless prismatic crystals from chloroform-hexane, triclinic space group  $P1$ ,  $a = 5.9167(9) \text{ \AA}$ ,  $b = 10.9747(17) \text{ \AA}$ ,  $c = 12.2265(18) \text{ \AA}$ ,  $\alpha = 64.4240(19)^\circ$ ,  $\beta = 82.5940(19)^\circ$ ,  $\gamma = 89.9950(19)^\circ$ ,  $V = 708.78(19) \text{ \AA}^3$ ,  $Z = 2$ ,  $\rho = 1.28 \text{ g/cm}^3$ ,  $\mu = 0.088 \text{ mm}^{-1}$ . The structure was solved by the direct method of full matrix least-squares, where the final  $R$  and  $wR$  were 0.0398 and 0.1003 for 9005 reflections. CCDC 1010750.

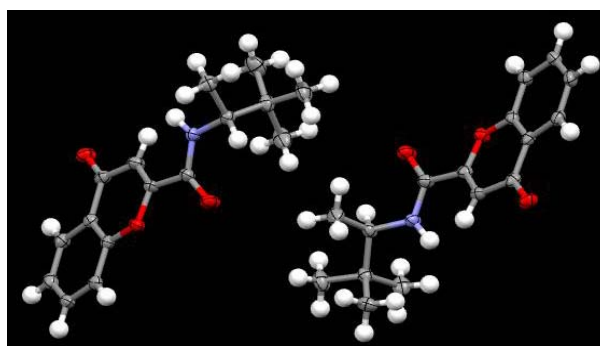

**Figure S2.** Perspective view of **1b**.

X-Ray diffraction analysis data of photodimer **2a**

Colorless prismatic crystals from chloroform-hexane, monoclinic space group  $P2_12_12_1$ ,  $a = 12.2096(9) \text{ \AA}$ ,  $b = 13.7443(10) \text{ \AA}$ ,  $c = 18.0044(14) \text{ \AA}$ ,  $V = 3021.4(4) \text{ \AA}^3$ ,  $Z = 4$ ,  $\rho = 1.290 \text{ g/cm}^3$ ,  $\mu = 0.088 \text{ mm}^{-1}$ . The structure was solved by the direct method of full matrix least-squares, where the final  $R$  and  $wR$  were 0.0469 and 0.1150 for 5358 reflections. CCDC 1010751.

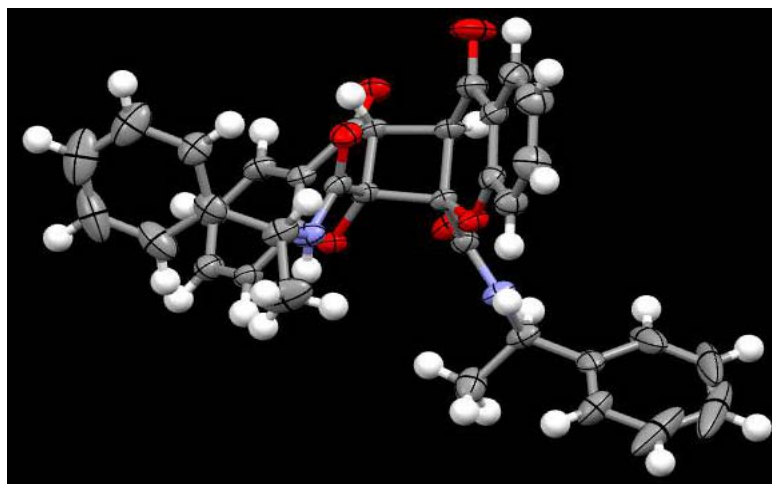

**Figure S3.** Perspective view of **2a**.

X-Ray diffraction analysis data of photodimer **2'a**

Colorless prismatic crystals from chloroform-hexane, monoclinic space group  $P2_12_12_1$ ,  $a = 9.7337(10) \text{ \AA}$ ,  $b = 13.9495(14) \text{ \AA}$ ,  $c = 22.104(2) \text{ \AA}$ ,  $V = 3001.3(5) \text{ \AA}^3$ ,  $Z = 4$ ,  $\rho = 1.298 \text{ g/cm}^3$ ,  $\mu = 0.088 \text{ mm}^{-1}$ . The structure was solved by the direct method of full matrix least-squares, where the final  $R$  and  $wR$  were 0.0424 and 0.0944 for 5287 reflections. CCDC 1010752.

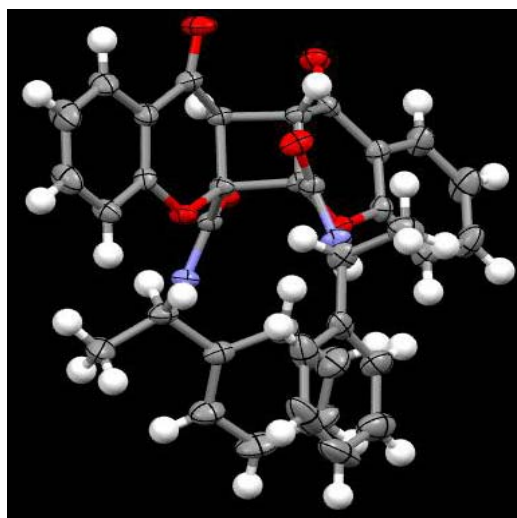

**Figure S4.** Perspective view of **2'a**.

X-Ray diffraction analysis data of photodimer **2b**

Colorless prismatic crystals from chloroform-hexane, monoclinic space group  $P2_12_12_1$ ,  $a = 7.704(18) \text{ \AA}$ ,  $b = 14.23(3) \text{ \AA}$ ,  $c = 26.50(6) \text{ \AA}$ ,  $V = 2906(11) \text{ \AA}^3$ ,  $Z = 4$ ,  $\rho = 1.249 \text{ g/cm}^3$ ,  $\mu = 0.086 \text{ mm}^{-1}$ . The structure was solved by the direct method of full matrix least-squares, where the final  $R$  and  $wR$  were 0.0629 and 0.1531 for 5433 reflections. CCDC 1010753. The absolute configuration could be determined on the basis of the configuration of (*R*)-1-(*t*-butyl)ethylamine.

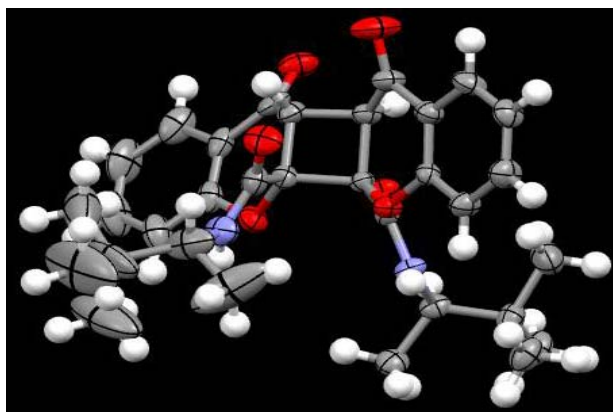

**Figure S5.** Perspective view of **2b**.

X-Ray diffraction analysis data of photodimer **2c**

Colorless prismatic crystals, monoclinic space group  $P2_12_12_1$ ,  $a = 8.021(3) \text{ \AA}$ ,  $b = 15.273(5) \text{ \AA}$ ,  $c = 21.484(7) \text{ \AA}$ ,  $V = 2631.9(15) \text{ \AA}^3$ ,  $Z = 4$ ,  $\rho = 1.389 \text{ g/cm}^3$ ,  $\mu = 0.107 \text{ mm}^{-1}$ . The structure was solved by the direct method of full matrix least-squares, where the final  $R$  and  $wR$  were 0.0535 and 0.0896 for 5909 reflections. CCDC 1010754. The absolute configuration could be determined on the basis of the configuration of (*S*)-alanine function.

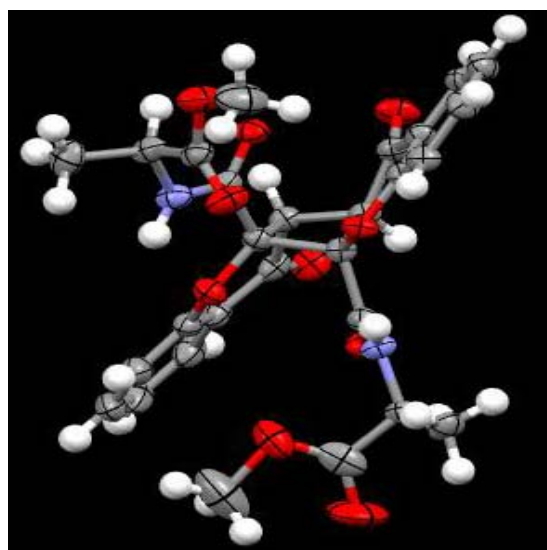

**Figure S6.** Perspective view of **2c**.

### X-Ray diffraction analysis data of photodimer **2'c**

This crystal included each one molecule of acetone and *N*-methylbenzamide. Colorless prismatic crystals, monoclinic space group  $P6_5$ ,  $a = 12.380(5) \text{ \AA}$ ,  $b = 12.380(5) \text{ \AA}$ ,  $c = 42.393(17) \text{ \AA}$ ,  $\gamma = 120.00^\circ$ ,  $V = 5627(4) \text{ \AA}^3$ ,  $Z = 6$ ,  $\rho = 1.317 \text{ g/cm}^3$ ,  $\mu = 0.098 \text{ mm}^{-1}$ . The structure was solved by the direct method of full matrix least-squares, where the final  $R$  and  $wR$  were 0.0631 and 0.1416 for 6805 reflections. CCDC 1010755.

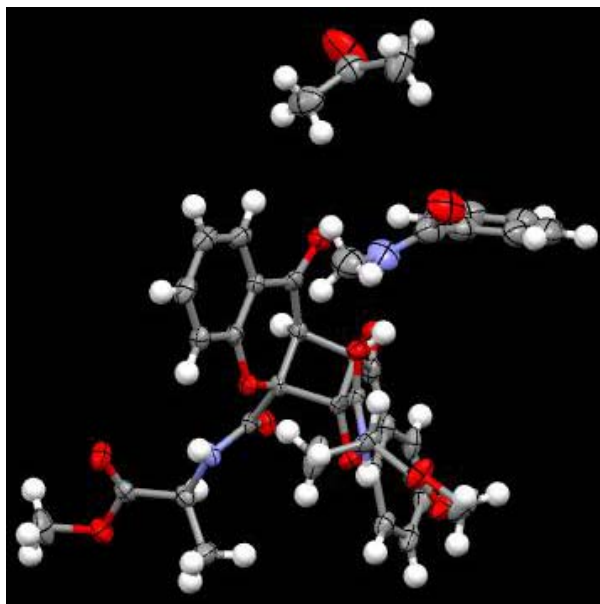

**Figure S7.** Perspective view of **2'c**.

Conformational calculation using Gaussian 09 program.

Total energy and dipole moment for two conformations, **1-A** and **1-B**, were estimated by DFT calculation using RB3LYP 6-31G in Gaussian 09W. (Scheme S1, Table S1 and S2).

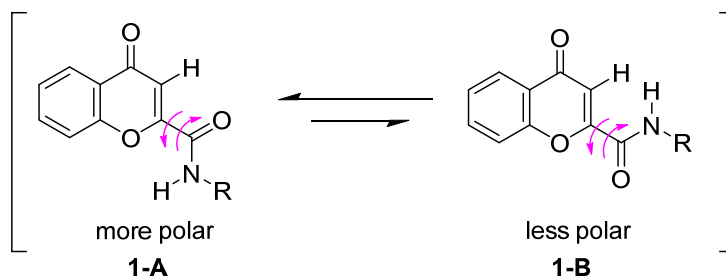

**Scheme S1.** Conformational change of **1**.

**Table S1.** Conformational analysis and the dipole moment of ground state of **1a–c**

| comps     | Ground state conformation | $\Delta H_B - \Delta H_A$<br>(kcal mol <sup>-1</sup> ) <sup>a</sup> | Dipole moment<br>(Deby) |
|-----------|---------------------------|---------------------------------------------------------------------|-------------------------|
| <b>1a</b> | A (more stable)           | 5.78                                                                | 6.75                    |
| <b>1a</b> | B (less stable)           |                                                                     | 2.21                    |
| <b>1b</b> | A (more stable)           | 5.98                                                                | 6.88                    |
| <b>1b</b> | B (less stable)           |                                                                     | 2.16                    |
| <b>1c</b> | A (more stable)           | 5.80                                                                | 7.01                    |
| <b>1c</b> | B (less stable)           |                                                                     | 3.15                    |

<sup>a</sup>Differences in total energy between stable conformation A and less stable conformation B in the ground state obtained from DFT (RB3LYP 6-31G) calculation in Gaussian 09W. <sup>b</sup>Dipole moment obtained from DFT (RB3LYP 6-31G) calculation in Gaussian 09W.

**Table S2.** Conformational analysis and the dipole moment of triplet excited state of **1a–c**

| comps     | Triplet excited state conformation | $\Delta H_B - \Delta H_A$<br>(kcal mol <sup>-1</sup> ) <sup>a</sup> | Dipole moment<br>(Deby) |
|-----------|------------------------------------|---------------------------------------------------------------------|-------------------------|
| <b>1a</b> | A (more stable)                    | 7.37                                                                | 5.93                    |
| <b>1a</b> | B (less stable)                    |                                                                     | 1.80                    |
| <b>1b</b> | A (more stable)                    | 7.76                                                                | 5.94                    |
| <b>1b</b> | B (less stable)                    |                                                                     | 1.33                    |
| <b>1c</b> | A (more stable)                    | 7.14                                                                | 5.61                    |
| <b>1c</b> | B (less stable)                    |                                                                     | 0.61                    |

<sup>a</sup>Differences in total energy between stable conformation A and less stable conformation B in the ground state obtained from DFT (RB3LYP 6-31G) calculation in Gaussian 09W. <sup>b</sup>Dipole moment obtained from DFT (RB3LYP 6-31G) calculation in Gaussian 09W.

Figure S8. <sup>1</sup>H NMR spectrum of 1a

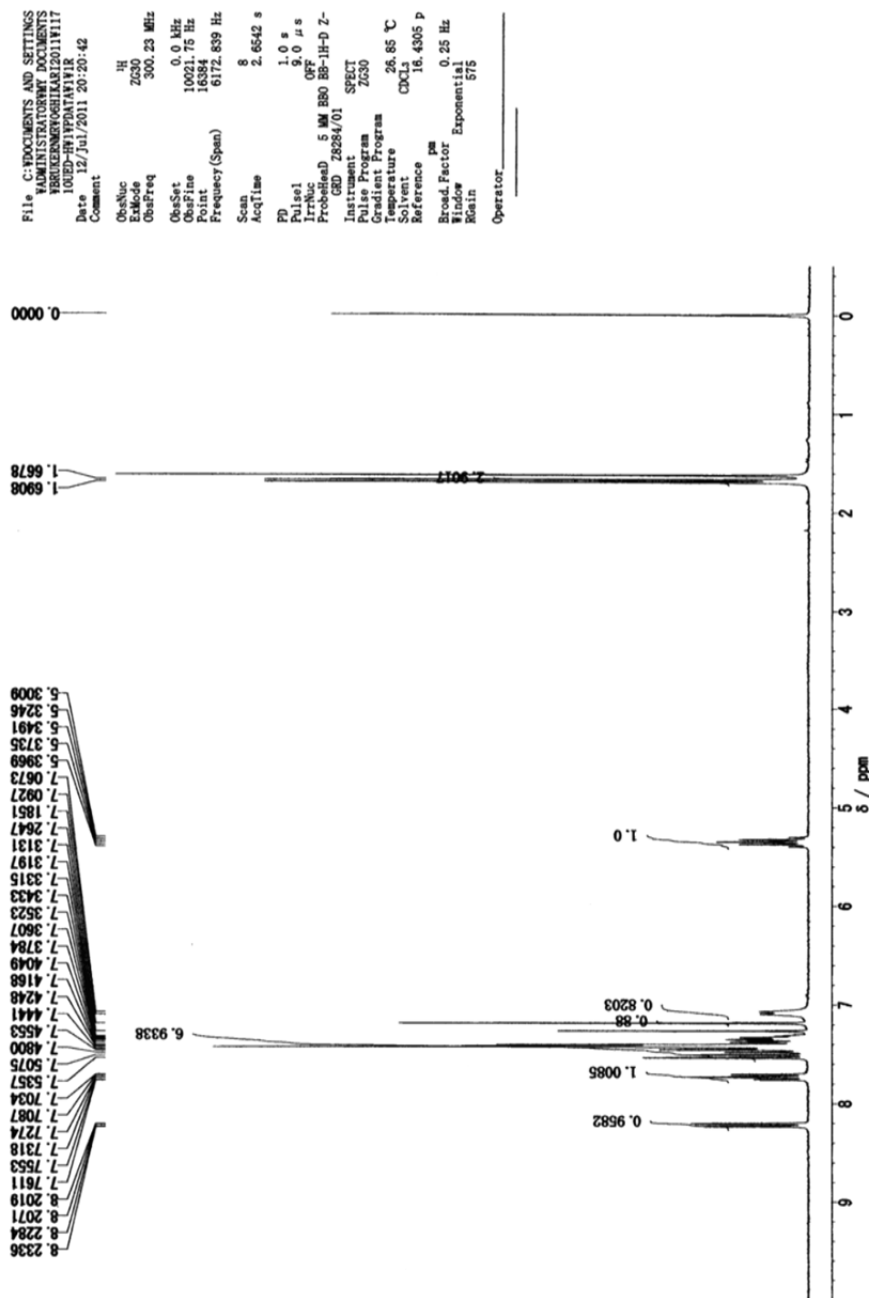

Figure S9.  $^{13}\text{C}$  NMR spectrum of **1a**

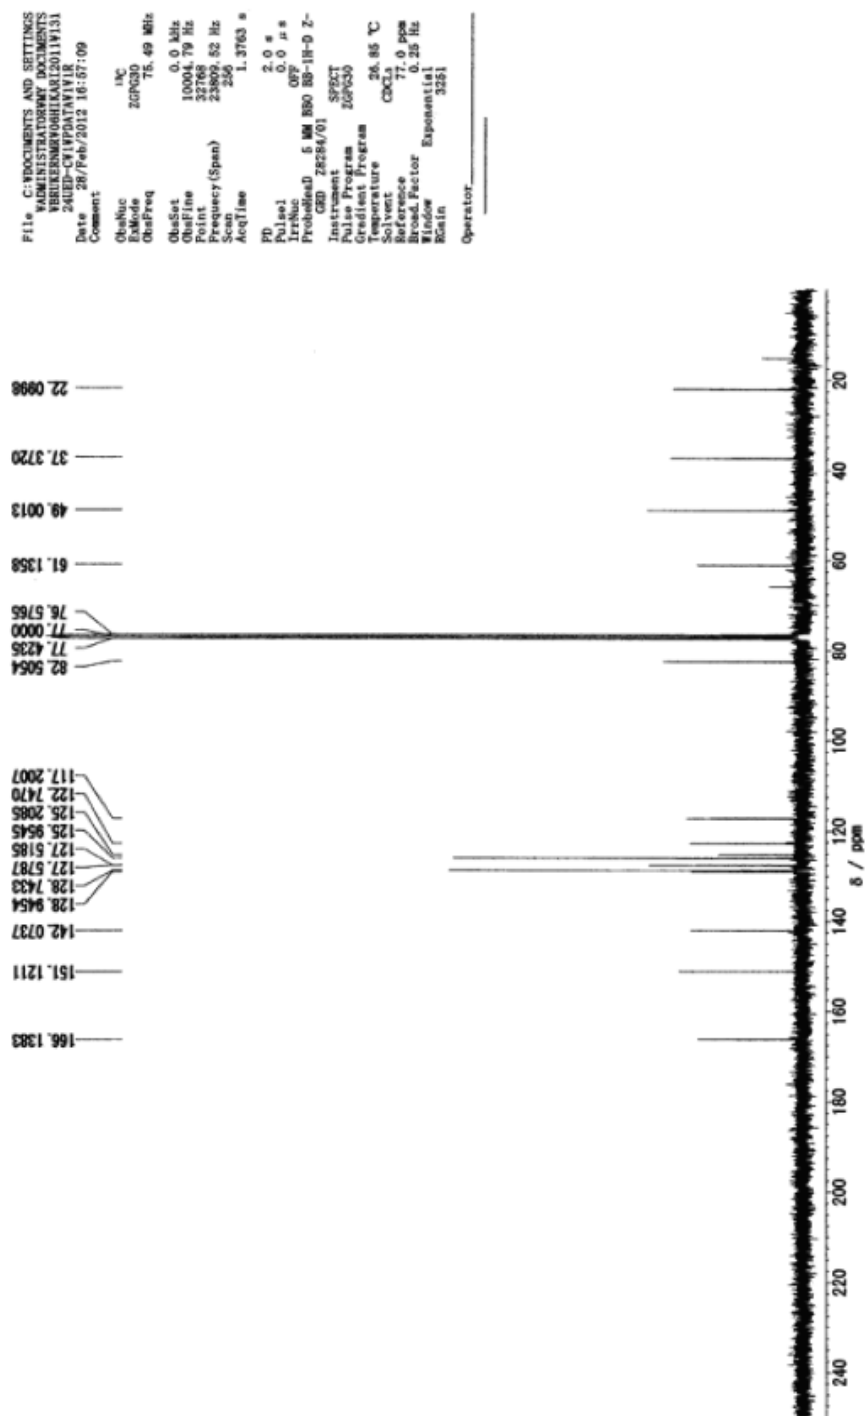

Figure S10. <sup>1</sup>H NMR spectrum of **1b**

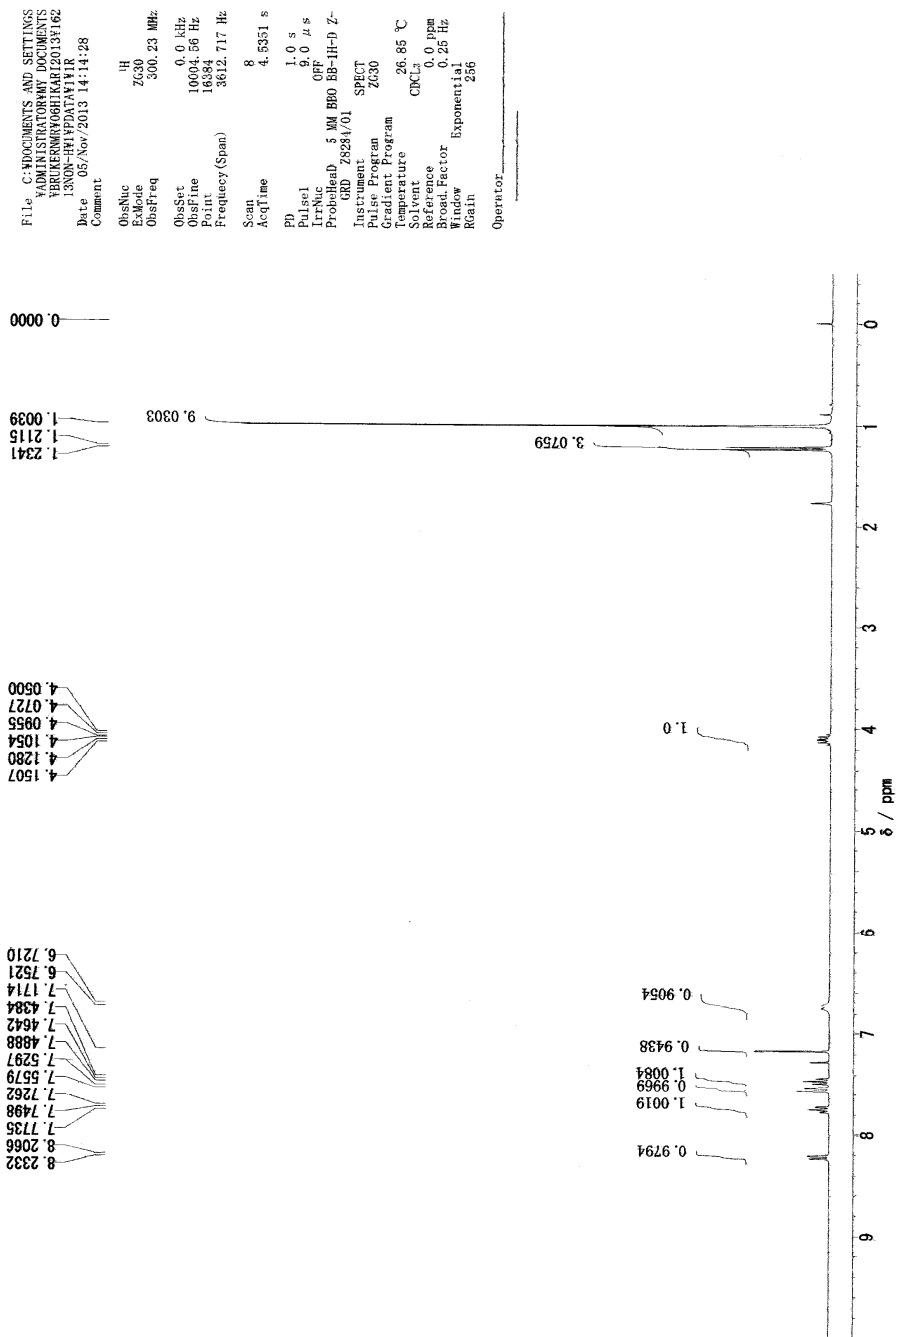



Figure S11. <sup>13</sup>C NMR spectrum of 1b

File: C:\DOCUMENTS AND SETTINGS  
 ADMINISTRATOR\ADMIN\DOCUMENTS  
 HRIRUERM696H1KAKI2013\162  
 14NON-CY1\FDATA\1\F1.R  
 Date: 05/Nov/2013 14:32:03  
 Comment:  
 ObsNuc: <sup>13</sup>C  
 ExptId: ZGPC92  
 ObsFreq: 75.49 MHz  
 ObsSft: 0.0 kHz  
 ObsFLine: 10003.05 Hz  
 Point: 32769  
 Frequency (Span): 18115.94 Hz  
 Scan: 256  
 AcqTime: 1.8098 s  
 PD: 2.0 s  
 Pulse: 0.0 μs  
 IrrNuc: OFF  
 ProbeHead: 5 MM BBO BB-HF-D Z-GRD Z8284/01  
 Instrument: SPECT  
 Pulse Program: ZGPC90  
 Gradient Program:  
 Temperature: 26.85 °C  
 Solvent: CDCl<sub>3</sub>  
 Reference: 77.0 ppm  
 Broad Factor: 0.25 Hz  
 Window: Exponential  
 RGain: 2580  
 Operator:

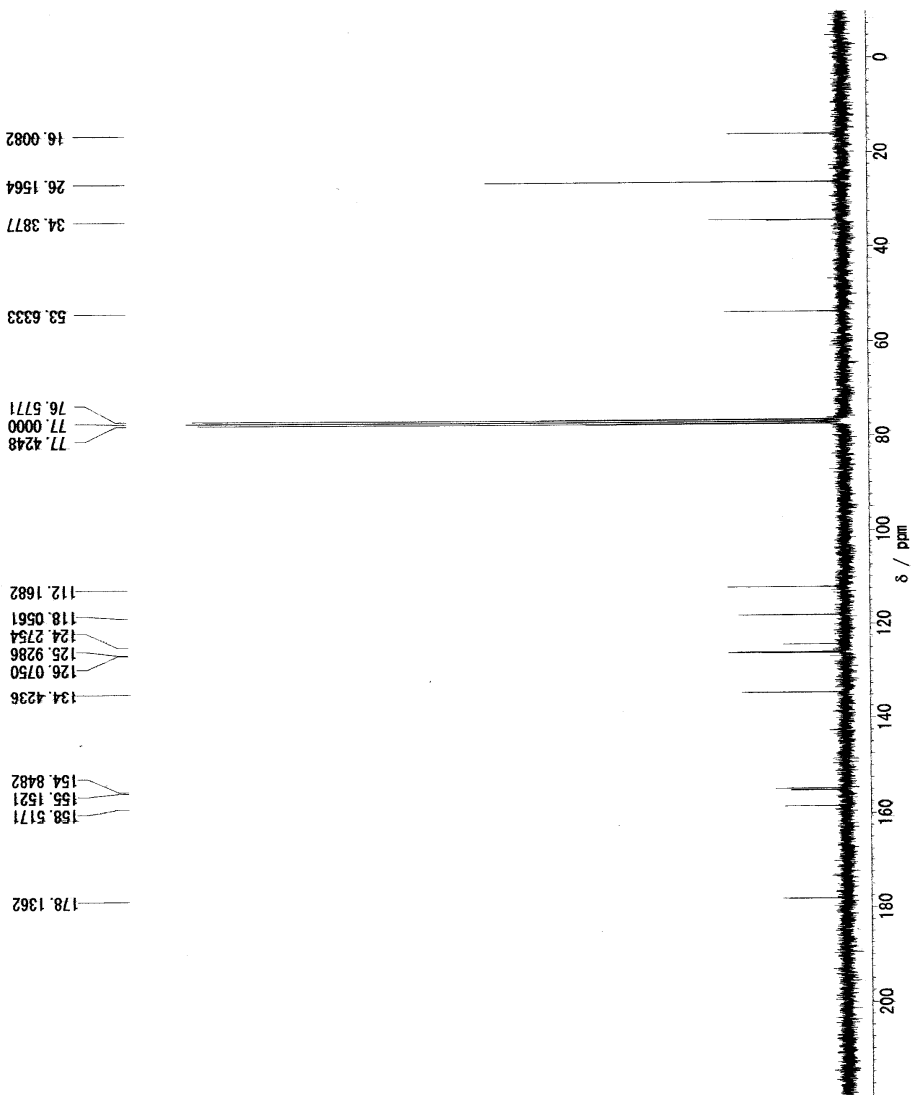

Figure S12. <sup>1</sup>H NMR spectrum of **1c**

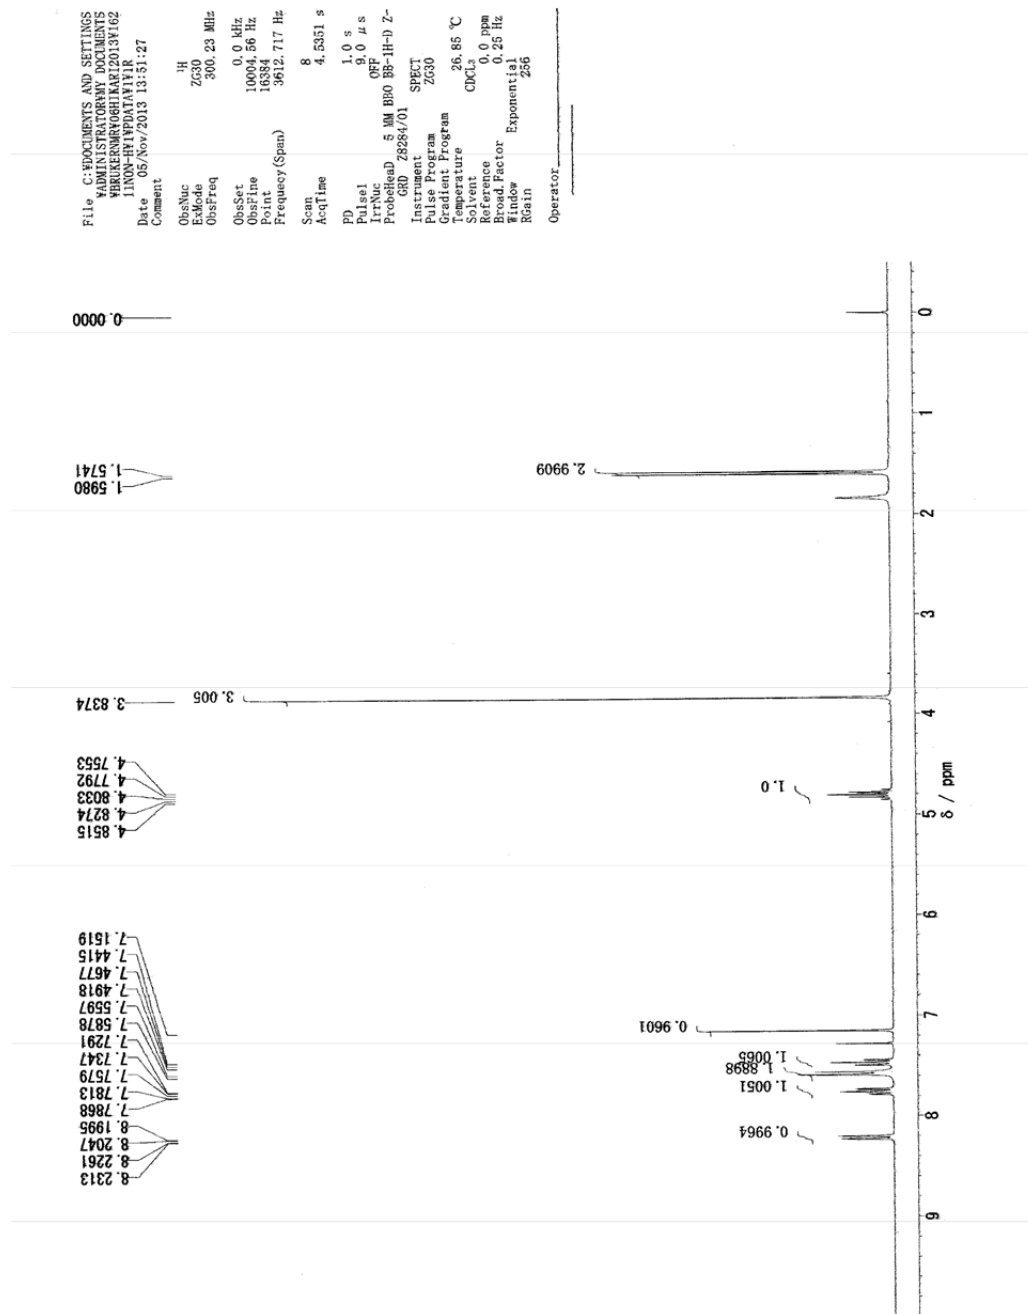

Figure S13. <sup>13</sup>C NMR spectrum of 1c

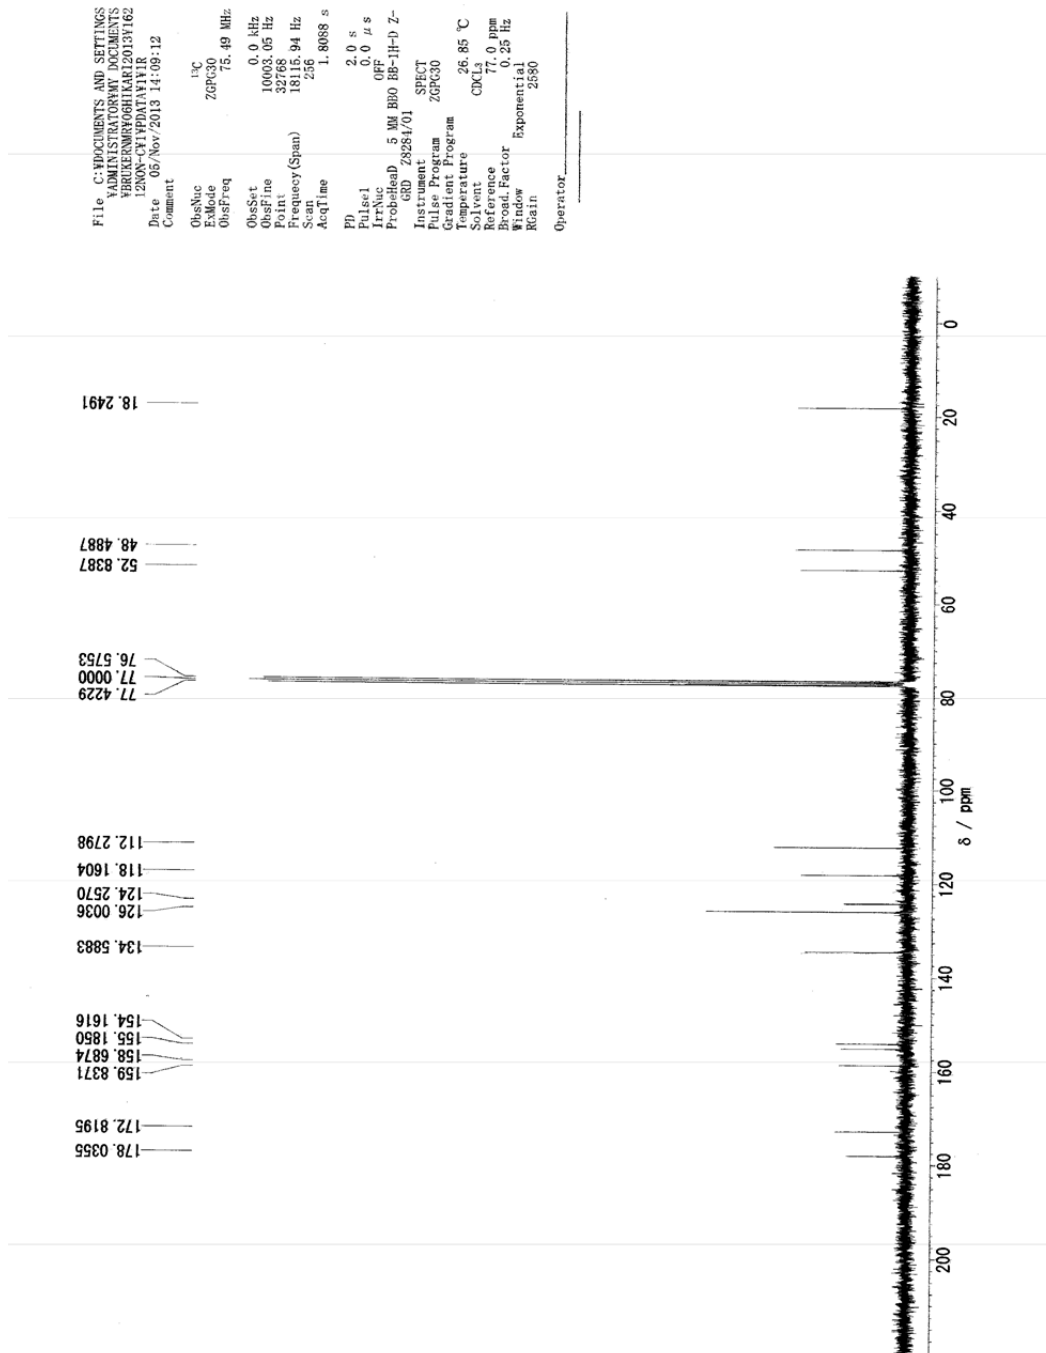

Figure S14. <sup>1</sup>H NMR spectrum of 2a

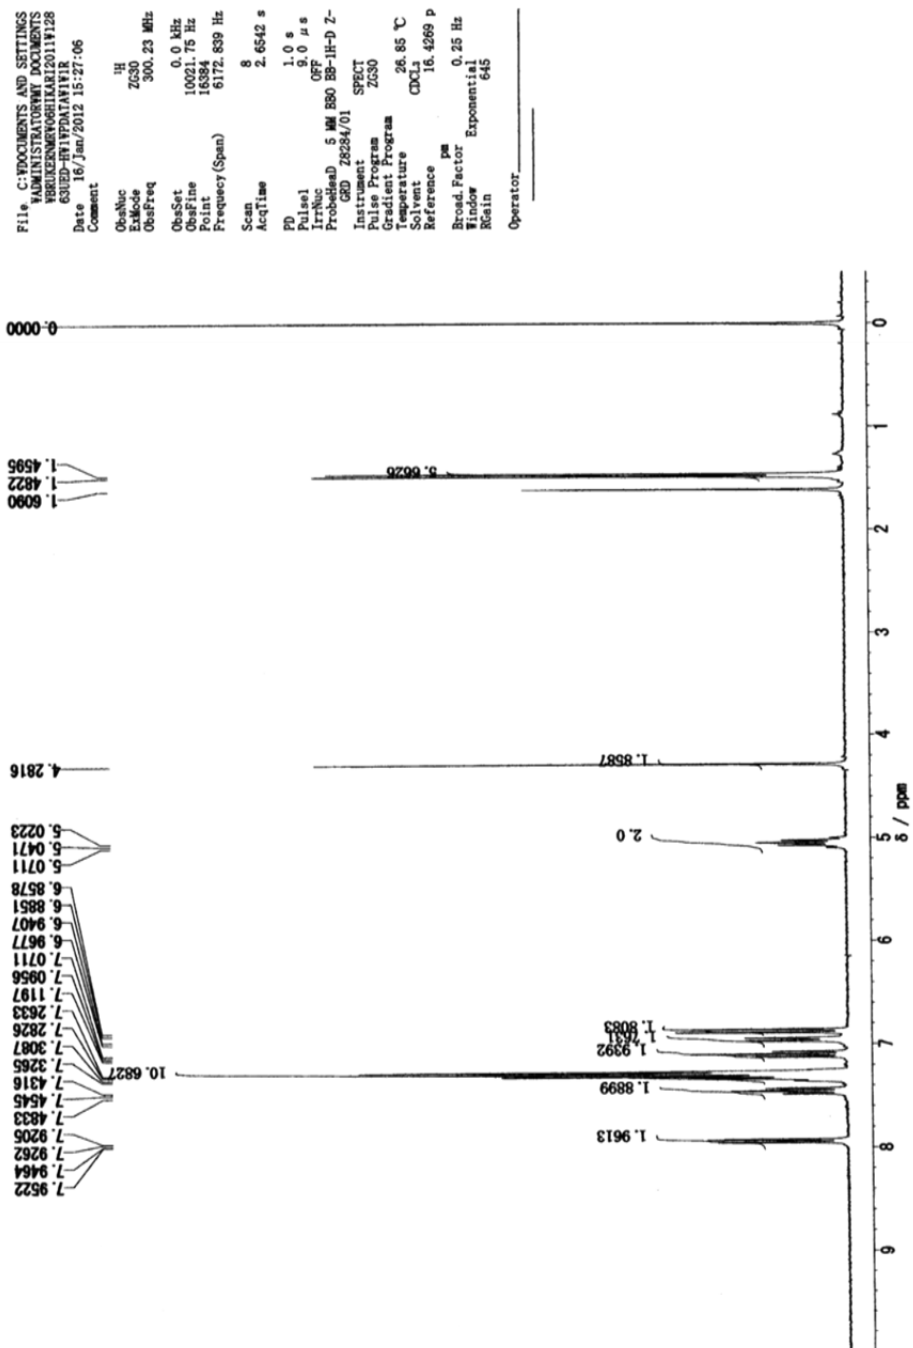

Figure S15. <sup>13</sup>C NMR spectrum of 2a

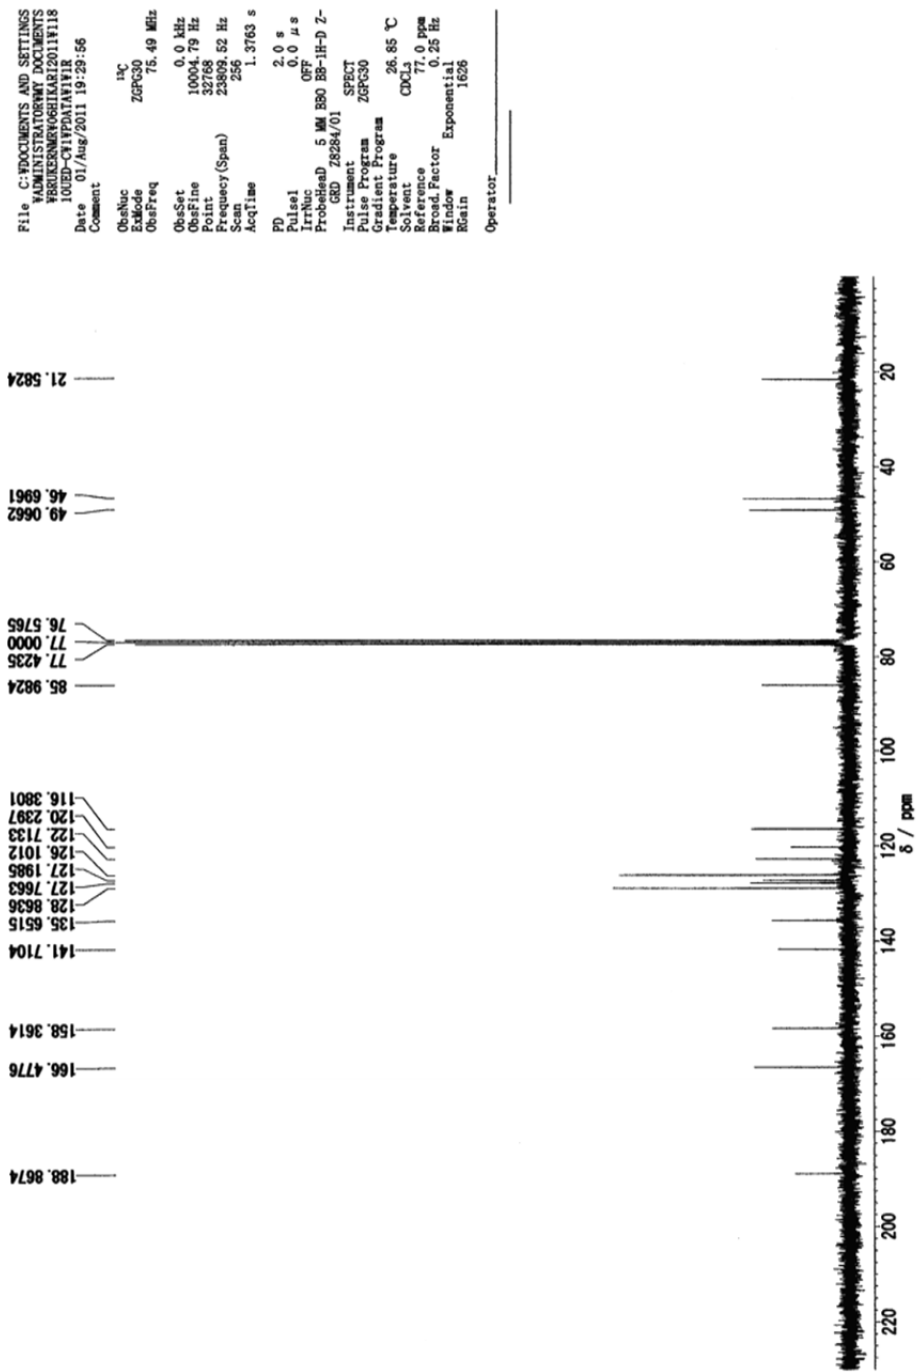

Figure S16. anti-HH dimer 2'a

File C:\DOCUMENTS AND SETTINGS  
 ADMINISTRATOR\ADMINISTRATOR\DOCUMENTS  
 YBRUKEN\MY06\KAR12013\167  
 46LED-H11\PPDATA\11R  
 Date 22/Jan/2014 13:26:25  
 Comment

ObsNuc H  
 ExMnte ZG30  
 ObsFreq 300.23 MHz

ObsSet 0.0 MHz  
 ObsFine 10004.56 Hz  
 Point 16384  
 Frequency (Span) 3612.717 Hz

Scan 8  
 AcqTime 4.5351 s

PP  
 Pulse1 1.0 s  
 TrNuc OFF  
 PropHead 5 MM BBO BS-IH-D Z-GRD 28284/01

Instrument SPECT  
 Pulse Program ZG30  
 Gradient Program  
 Temperature 26.85 °C  
 Solvent CMCLo  
 Reference 10.9872 p

Broad Factor 0.25 Hz  
 Window Exponential  
 Roll 575

Operator

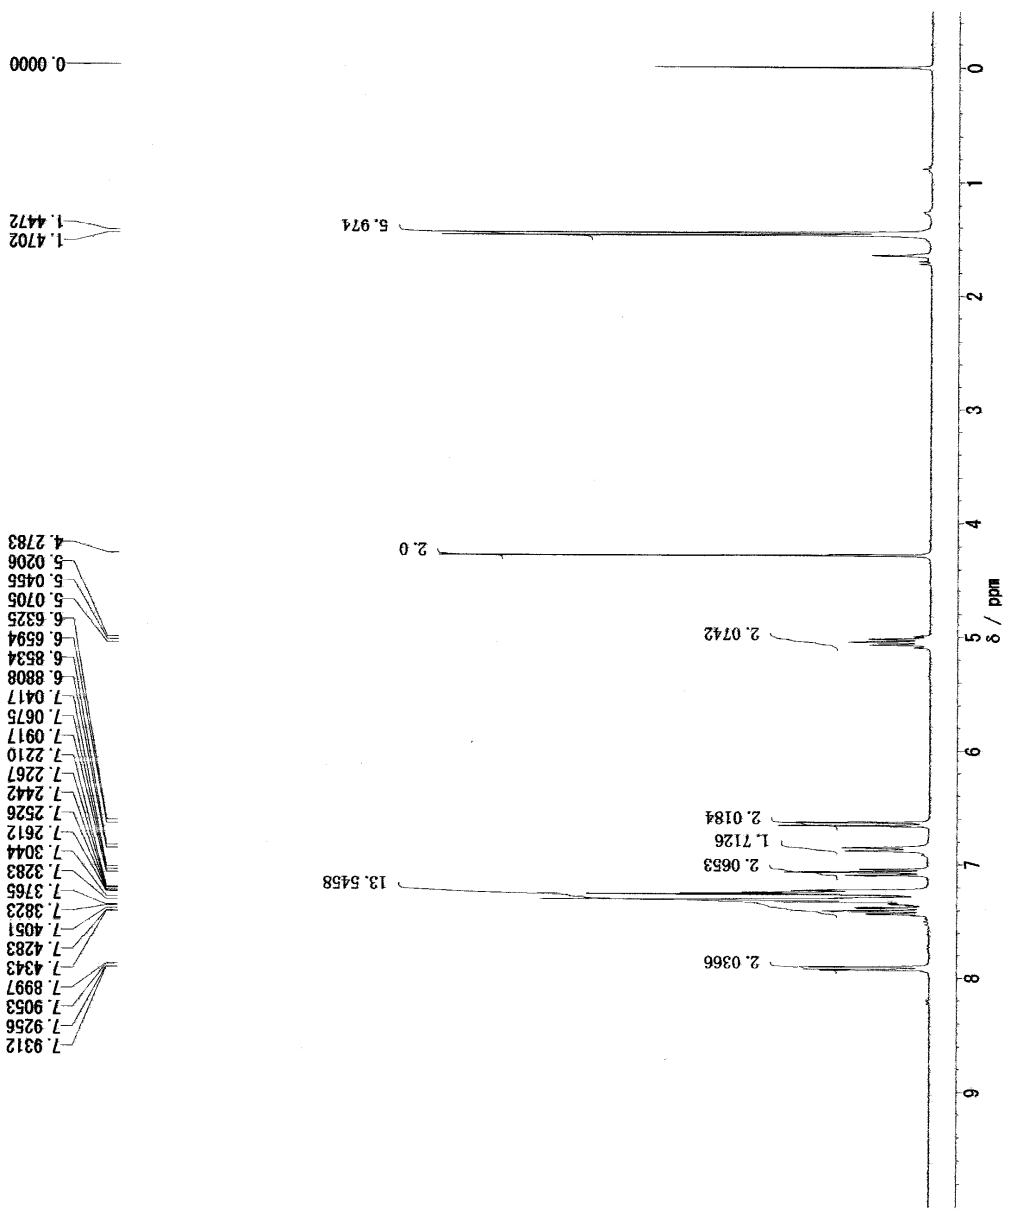

Figure S17. anti-HH dimer 2'a

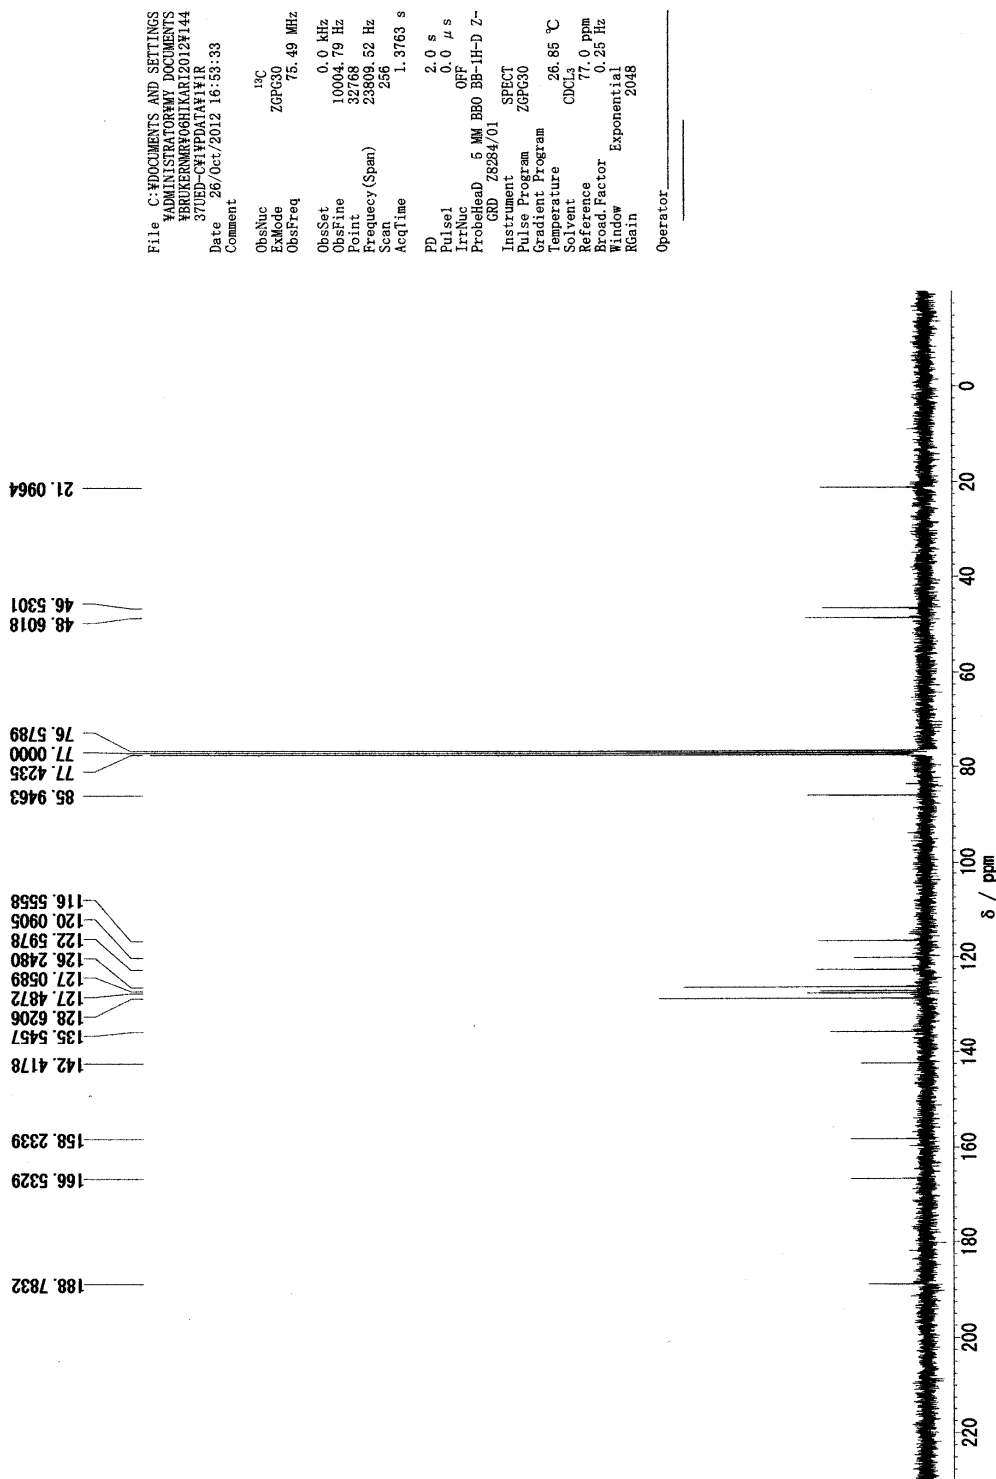

Figure S18. <sup>1</sup>H NMR spectrum of 2b

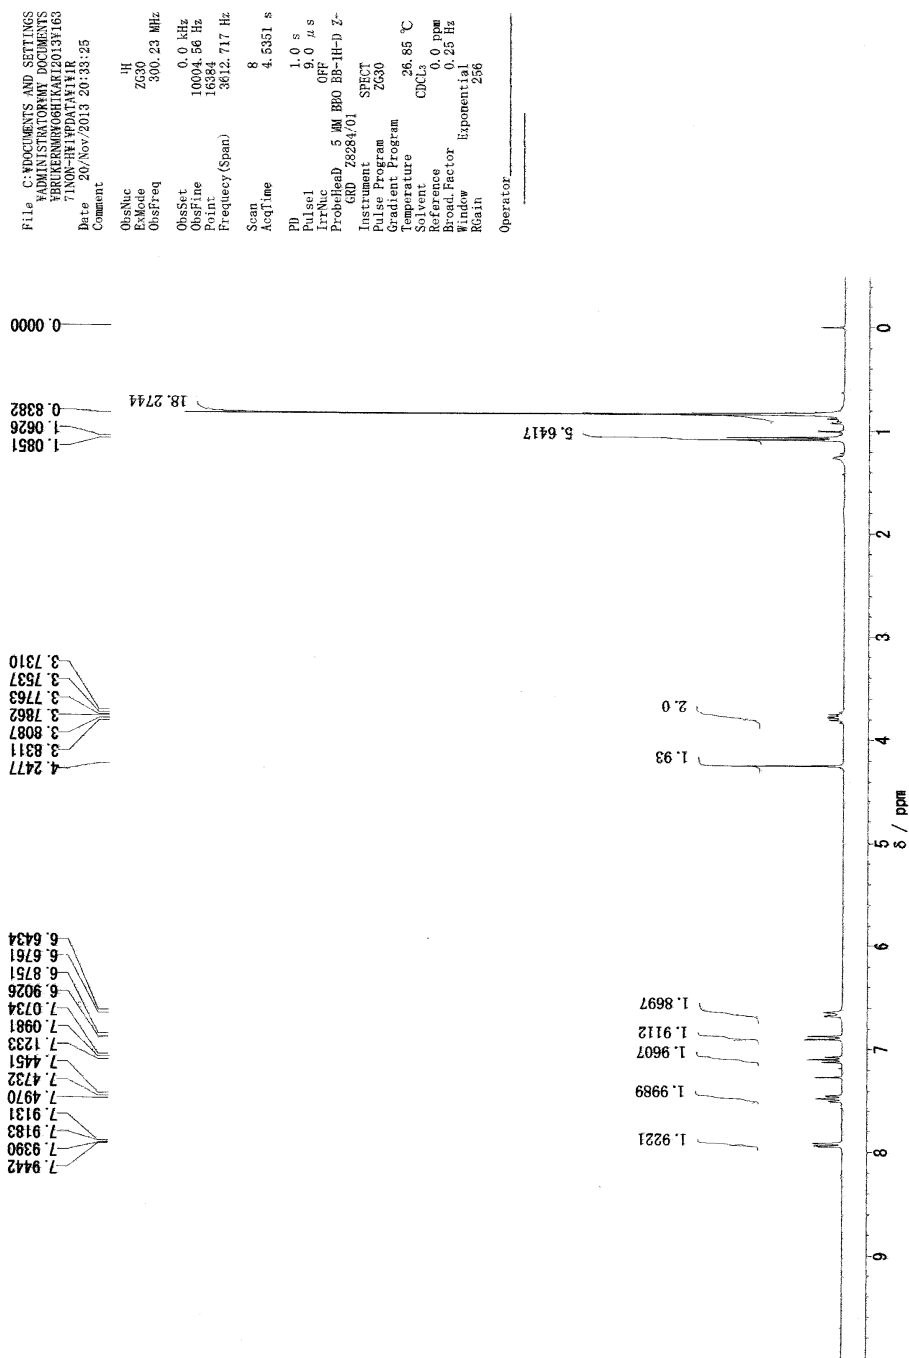



Figure S19. <sup>13</sup>C NMR spectrum of 2b

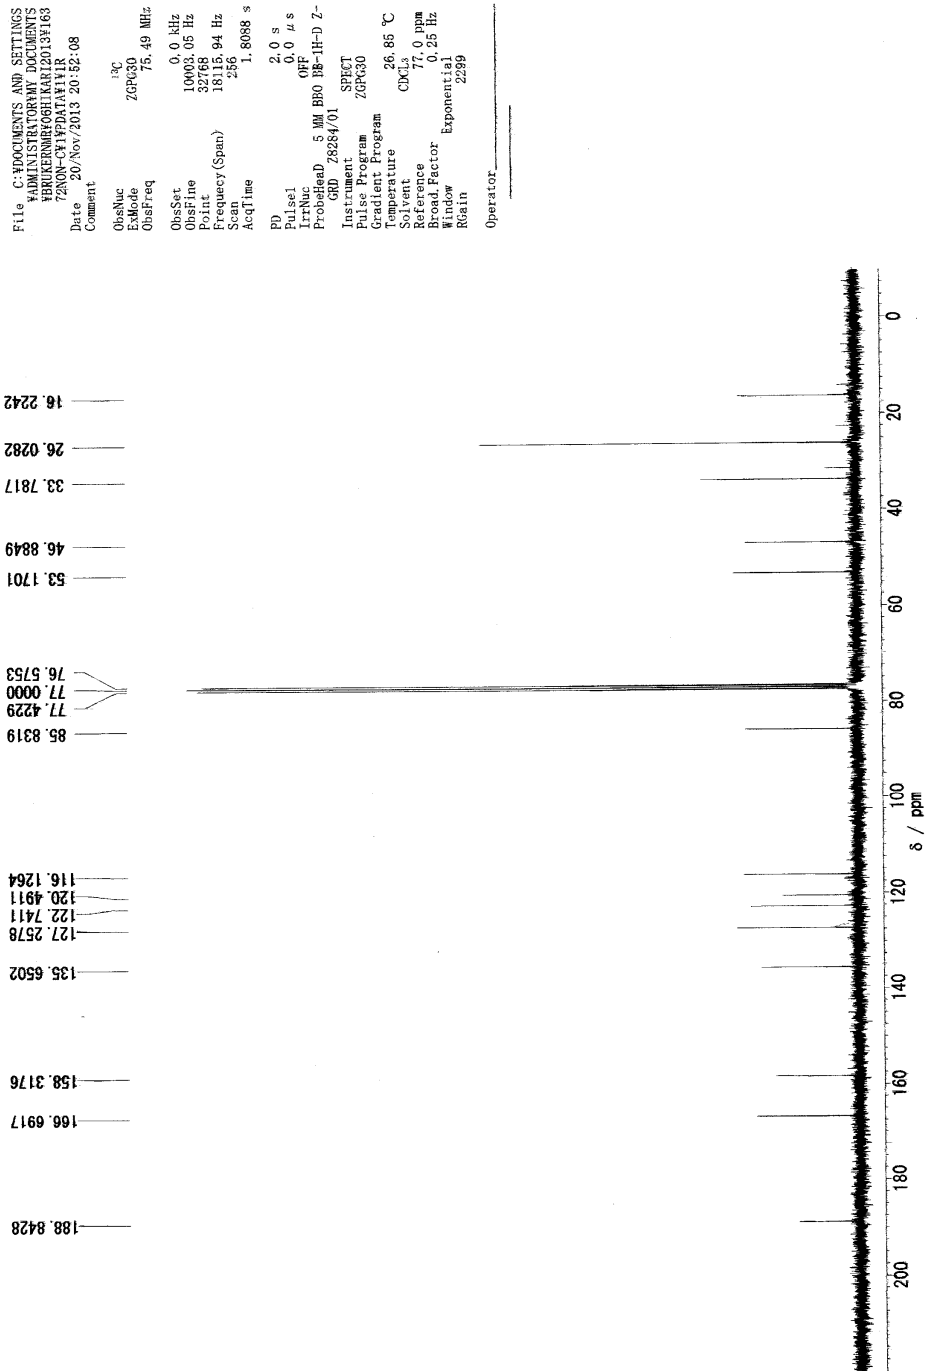

Figure S20. <sup>1</sup>H NMR spectrum of 2'b

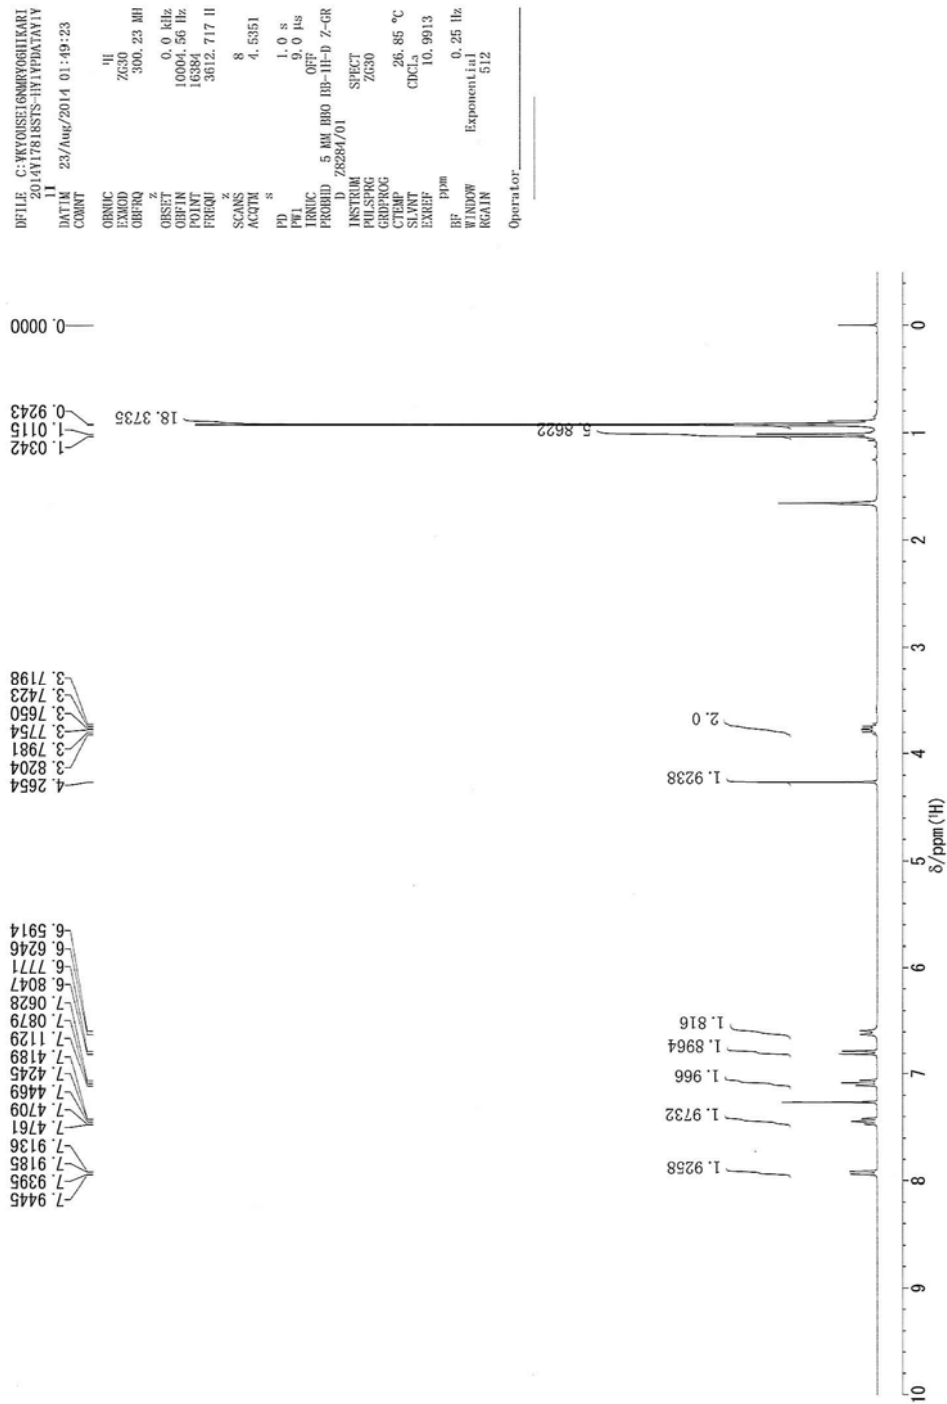

Figure S21. <sup>13</sup>C NMR spectrum of 2'b

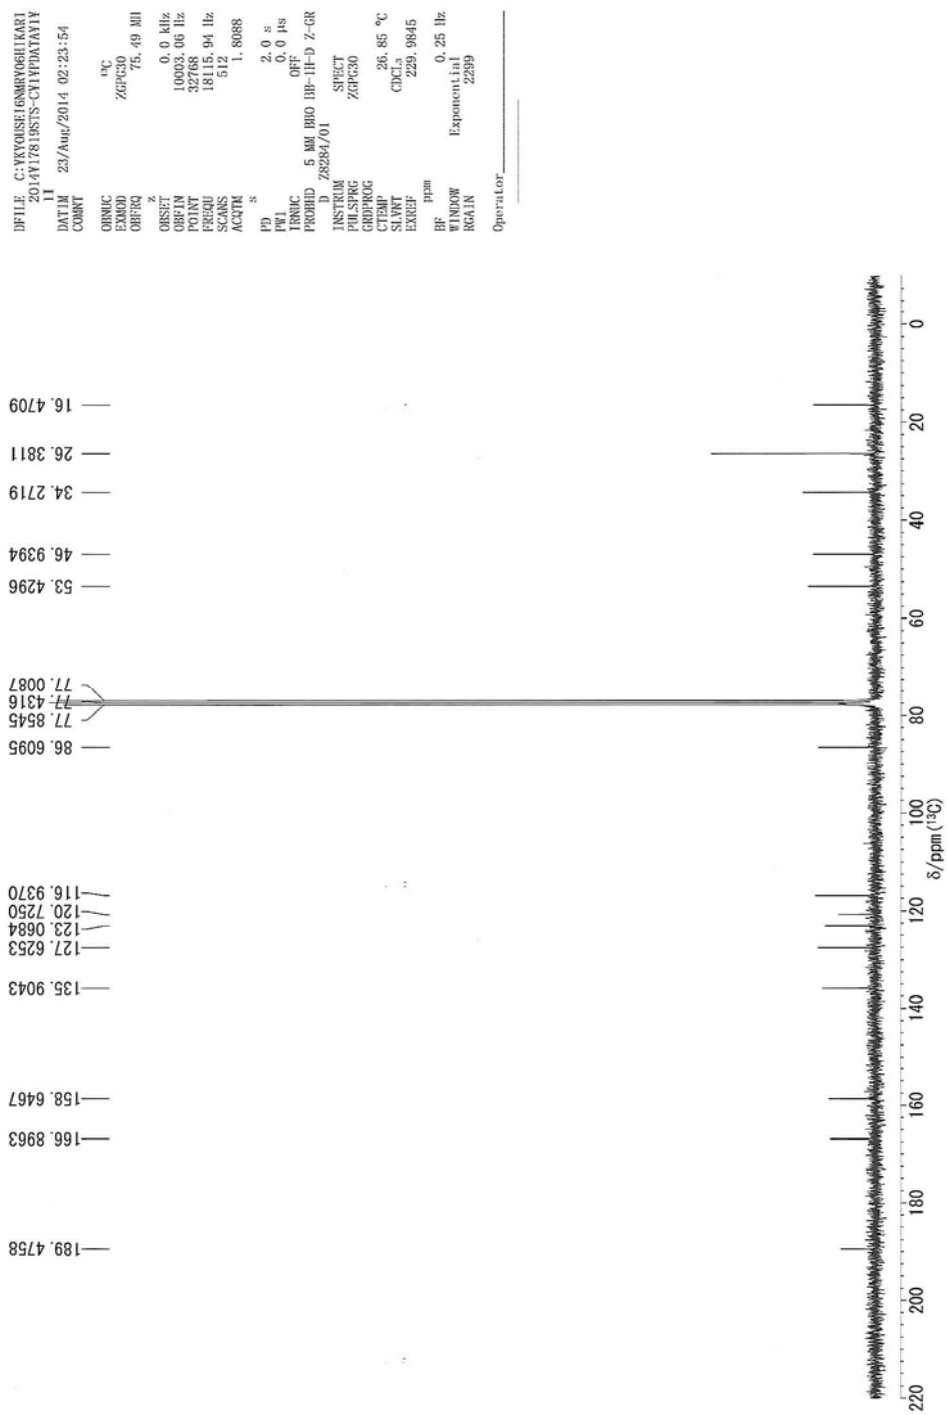

Figure S22. <sup>1</sup>H NMR spectrum of 2c

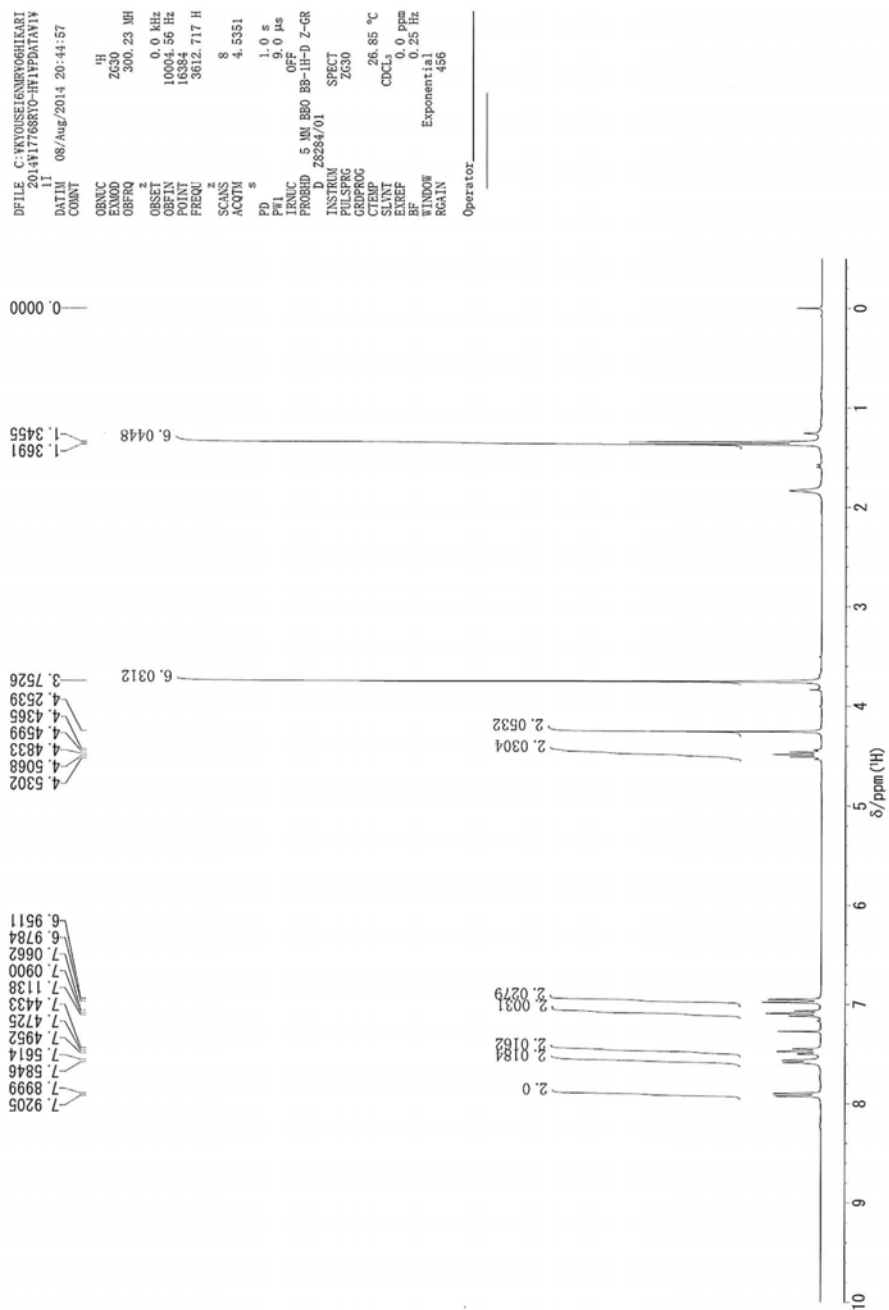

Figure S23. <sup>13</sup>C NMR spectrum of 2c

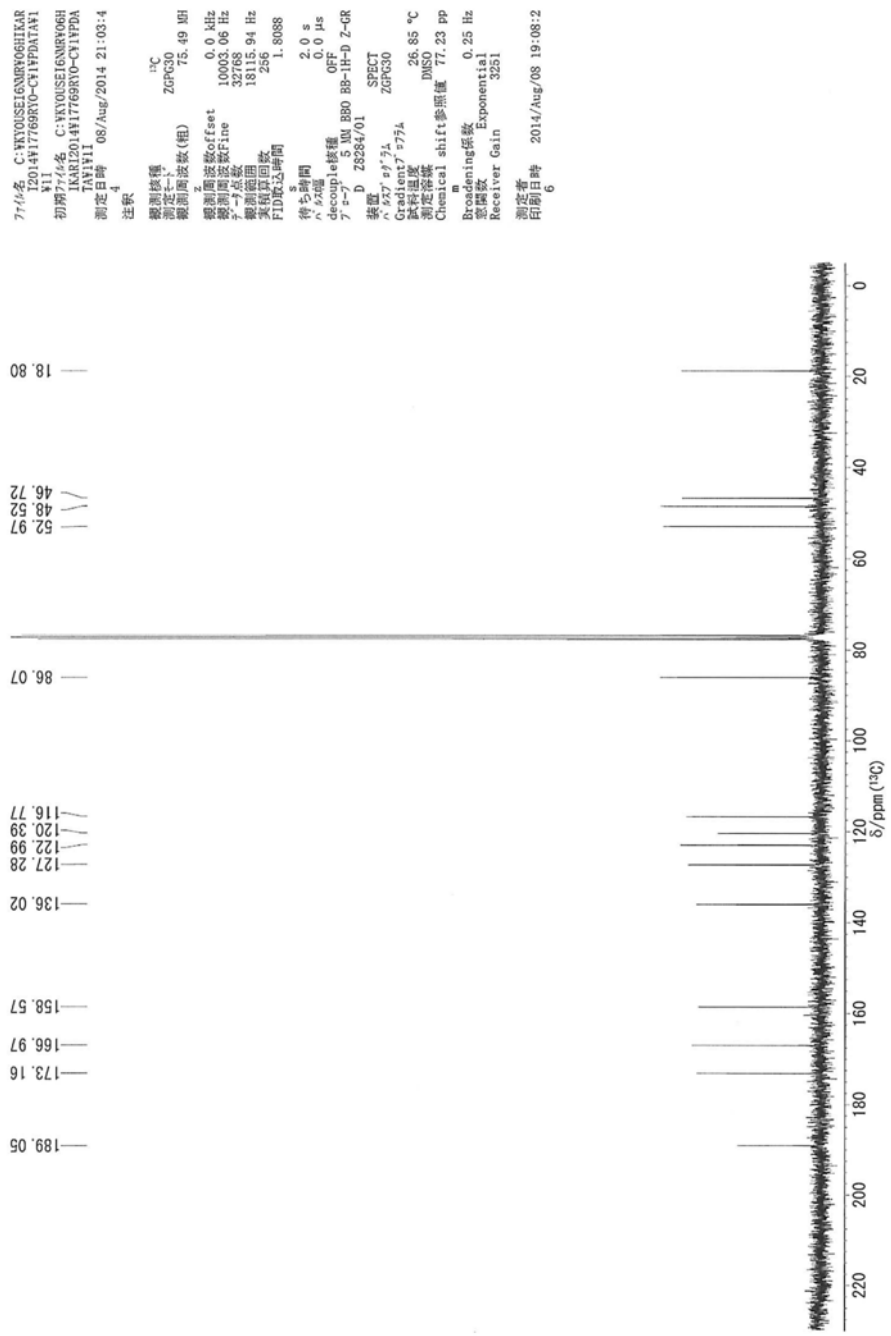

Figure S24. <sup>1</sup>H NMR spectrum of 2'c

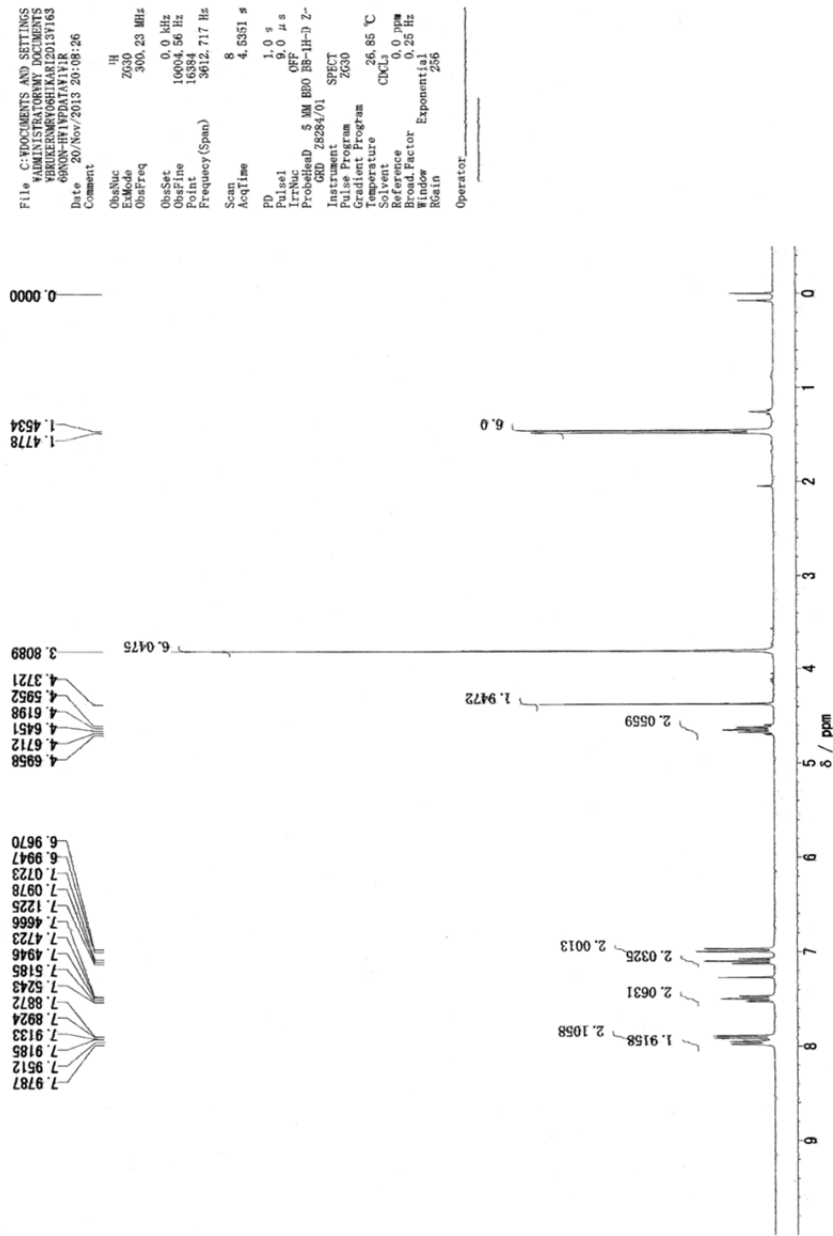

Figure S25.  $^{13}\text{C}$  NMR spectrum of **2**'c

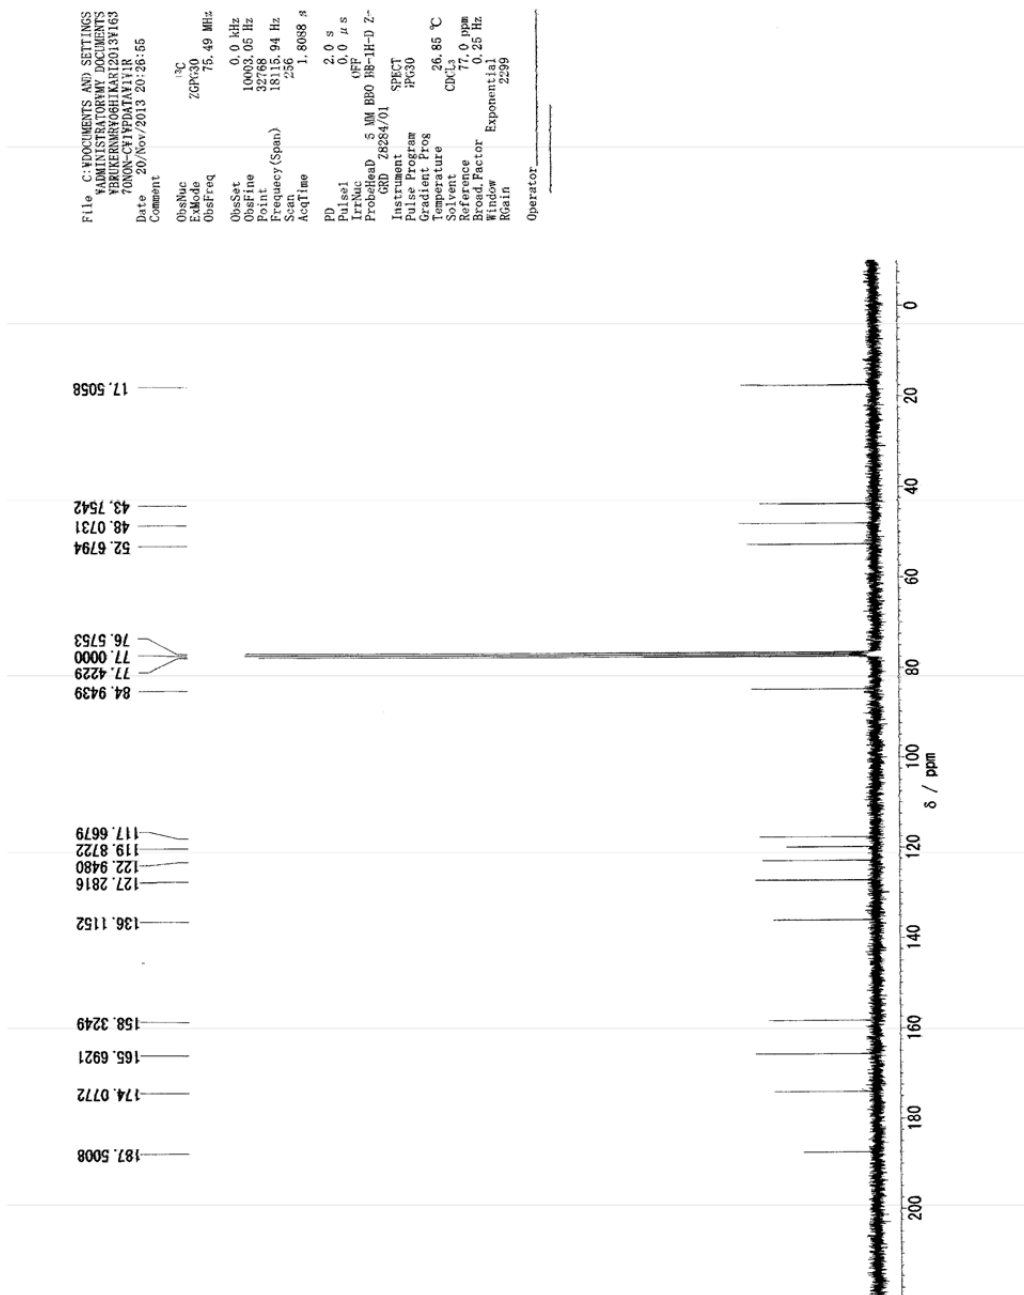

Supplement: c4ob01827c1.pdf [file c4ob01827c1.pdf]
